# Supplementary material
Source: publisher figshare collection journal article supplement (https://acs.figshare.com/ndownloader/files/3873016)
Supplement: Supplementary file 1 [file 3873016]

#===============================================================================

data_global
#===============================================================================

# 1. SUBMISSION DETAILS

_publ_contact_author # Name and address of author for correspondence

;     Luis A. L\'opez 
      Instituto Universitario de Qu\'imica Organomet\'alica "Enrique Moles" 
      Departamento de Qu\'imica Org\'anica e Inorg\'anica
      Universidad de Oviedo
      Juli\'an Claver\'ia 8
      33006-Oviedo
      Spain
;

_publ_contact_author_phone        '0034 98 510 6223'
_publ_contact_author_email         lalg@uniovi.es 

_publ_requested_journal           'Chemistry - A European Journal'
_publ_requested_coeditor_name     ''
_publ_contact_letter
;
Oviedo 12/JUN/2014

Please receive the CIF for compounds 3f and 5b.

     Thank you very much.

     L. A. L\'opez.
;
             
#==============================================================================

# 2. PROCESSING SUMMARY (IUCr Office Use Only)

_journal_date_recd_electronic     ?

_journal_date_to_coeditor         ?
_journal_date_from_coeditor       ?
_journal_date_accepted            ?

_journal_date_printers_first      ?
_journal_date_printers_final      ?
_journal_date_proofs_out          ?
_journal_date_proofs_in           ?

_journal_coeditor_name            ?
_journal_coeditor_code            ?
_journal_coeditor_notes
 ?

_journal_techeditor_code          ?
_journal_techeditor_notes
 ?

_journal_coden_ASTM               ?
_journal_name_full                ? 
_journal_year                     ?
_journal_volume                   ?
_journal_issue                    ?
_journal_page_first               ?
_journal_page_last                ?

_journal_suppl_publ_number        ?
_journal_suppl_publ_pages         ?

#==============================================================================

# 3. TITLE AND AUTHOR LIST

_publ_section_title
;
Gold-Catalyzed C-H Bond Functionalization of Metallocenes: Synthesis of
Density Functionalized Ferrocene Derivatives
;

# The loop structure below should contain the names and addresses of all

#authors, in the required order of publication. Repeat as necessary.

loop_
       _publ_author_name
       _publ_author_address

      'Enol L\'opez'
;      Instituto Universitario de Qu\'imica Organomet\'alica "Enrique Moles" 
       Departamento de Qu\'imica Org\'anica e Inorg\'anica 
       Universidad de Oviedo
       Juli\'an Claver\'ia 8
       33006-Oviedo
       Spain
;
      'Giacomo Lonzi'
;      Instituto Universitario de Qu\'imica Organomet\'alica "Enrique Moles"
       Departamento de Qu\'imica Org\'anica e Inorg\'anica
       Universidad de Oviedo
       Juli\'an Claver\'ia 8
       33006-Oviedo
       Spain
;
      'Luis A. L\'opez'
;      Instituto Universitario de Qu\'imica Organomet\'alica "Enrique Moles" 
       Departamento de Qu\'imica Org\'anica e Inorg\'anica 
       Universidad de Oviedo
       Juli\'an Claver\'ia 8
       33006-Oviedo
       Spain
;
#==========================================================================

# 4. TEXT

_publ_section_exptl_prep
;
3f) A clear orange prismatic-like specimen of C~16~H~18~FeO, approximate 
dimensions
0.22 mm \\times 0.41 \\times 0.42 mm, was used for the X-ray crystallographic 
analysis. The X-ray intensity data were measured. A total of 1870 frames were 
collected. The total exposure time was 1.04 hours. The frames were integrated
with the Bruker SAINT software package using a narrow-frame algorithm. The 
integration of the data using a monoclinic cell yielded a total of 24120 
reflections to a maximum \q angle of 25.35\% (0.83 \%A resolution),
of which 2515 were independent (average redundancy 9.598, completeness =
99.8%, R~int~ = 3.03%, R~sig~ = 1.62%) and 2221 (83.31%) were greater than
2\s(F^2^). The final cell constants of a = 16.1282(3) \%A, b = 9.6164(2) \%A,
c = 8.9291(2) \%A, \b = 98.1060(10)\%, volume = 1371.02(5) \%A^3^, 
are based upon 
the refinement of the XYZ-centroids of 9724 reflections above 20\s(I) with
4.944\% < 2\q < 51.76\%. Data were corrected for absorption effects using the
multi-scan method (SADABS). The ratio of minimum to maximum apparent
transmission was 0.832. The calculated minimum and maximum transmission 
coefficients (based on crystal size) are 0.6587 and 0.7963. 

5b) A clear colourless needle-like specimen of C~18~H~22~O~2~Ru, 
approximate dimensions
0.04 mm \\times 0.09 mm \\times 0.38 mm, 
was used for the X-ray crystallographic 
analysis. The X-ray intensity data were measured. A total of 4023 frames were 
collected. The total exposure time was 16.76 hours. The frames were integrated
with the Bruker SAINT software package using a narrow-frame algorithm. The 
integration of the data using a triclinic cell yielded a total of 19554 
reflections to a maximum \q angle of 25.35\% (0.83 \%A resolution),
of which 3001 were independent (average redundancy 6.516, completeness =
99.7%, R~int~ = 2.15%, R~sig~ = 1.37%) and 2819 (93.94%) were greater than
2\s(F^2^). The final cell constants of a = 6.02370(10) \%A, b = 11.2033(2) \%A,
c = 13.4735(3) \%A, \a = 112.7480(10)\%, \b = 96.2760(10)\%,
\g = 95.6760(10)\%, volume = 823.57(3) \%A^3^, are based upon 
the refinement of the XYZ-centroids of 9983 reflections above 20\s(I) with
6.133\% < 2\q < 55.74\%. Data were corrected for absorption effects using the
multi-scan method (SADABS). The ratio of minimum to maximum apparent
transmission was 0.875. The calculated minimum and maximum transmission 
coefficients (based on crystal size) are 0.7133 and 0.9629. 
;

_publ_section_exptl_refinement
;
3f) The structure was solved and refined using the Bruker SHELXTL Software 
Package,
using the space group P12~1~/c1, with Z = 4 for the formula unit, 
C~16~H~18~FeO. The final anisotropic full-matrix least-squares refinement on
F^2^ with 165 variables converged at R1 = 2.44%, for the observed data and
wR2 = 7.27% for all data. The goodness-of-fit was 1.000. The largest peak
in the final difference electron density synthesis was 0.203 e^-^/\%A^3^ and
the largest hole was -0.224 e^-^/\%A^3^ with an RMS deviation of 0.037
e^-^/\%A^3^.
On the basis of the final model, the
calculated density was 1.367 g/cm^3^ and F(000), 592 e^-^.

5b)The structure was solved and refined using the Bruker SHELXTL Software 
Package,
using the space group P-1, with Z = 2 for the formula unit, 
C~18~H~22~O~2~Ru. The final anisotropic full-matrix least-squares refinement on
F^2^ with 193 variables converged at R1 = 1.97%, for the observed data and
wR2 = 8.18% for all data. The goodness-of-fit was 1.000. The largest peak
in the final difference electron density synthesis was 0.487 e^-^/\%A^3^ and
the largest hole was -0.397 e^-^/\%A^3^ with an RMS deviation of 0.134
e^-^/\%A^3^.
On the basis of the final model, the
calculated density was 1.498 g/cm^3^ and F(000), 380 e^-^.
;

_publ_section_references
;
;

data_3f

_audit_creation_method                  'APEX2 v2010.9-1'
_chemical_name_systematic
;
 ? 
;
_chemical_name_common                   ? 
_chemical_formula_moiety                ? 
_chemical_formula_sum                   
'C16 H18 Fe O'
_chemical_formula_iupac                 ?
_chemical_formula_weight                282.15
_chemical_compound_source               'synthesis'

_chemical_melting_point                 ?

_space_group_crystal_system             monoclinic
_space_group_name_H-M_alt               'P 1 21/c 1'
_space_group_name_Hall                  '-P 2ybc'
loop_
    _space_group_symop_operation_xyz
    'x, y, z'
    '-x, y+1/2, -z+1/2'
    '-x, -y, -z'
    'x, -y-1/2, z-1/2'

_cell_length_a                          16.1282(3)
_cell_length_b                          9.6164(2)
_cell_length_c                          8.9291(2)
_cell_angle_alpha                       90
_cell_angle_beta                        98.1060(10)
_cell_angle_gamma                       90
_cell_volume                            1371.02(5)
_cell_formula_units_Z                   4
_cell_measurement_reflns_used           9724
_cell_measurement_theta_min             2.4724
_cell_measurement_theta_max             25.8843
_cell_measurement_temperature           296.(2)

_exptl_crystal_description              prismatic
_exptl_crystal_colour                   'clear orange'
_exptl_crystal_size_max                 0.420
_exptl_crystal_size_mid                 0.410
_exptl_crystal_size_min                 0.220
_exptl_crystal_density_diffrn           1.367
_exptl_crystal_density_meas             ?
_exptl_crystal_density_method           'not measured'
_exptl_crystal_F_000                    592

_exptl_absorpt_coefficient_mu           1.085
_exptl_absorpt_correction_type          multi-scan
_exptl_absorpt_process_details          sadabs
_exptl_absorpt_correction_T_min         0.66
_exptl_absorpt_correction_T_max         0.80

_exptl_special_details                  
;
; 

_diffrn_ambient_temperature             296.(2)

_diffrn_source                          ?
_diffrn_source_type                     ?

_diffrn_radiation_type                  ?
_diffrn_radiation_wavelength            0.71073
_diffrn_radiation_monochromator         ?

_diffrn_measurement_device_type         ?
_diffrn_measurement_method              ?

_diffrn_detector_area_resol_mean        8.3333

_diffrn_reflns_number                   24140
_diffrn_reflns_av_R_equivalents         0.0303
_diffrn_reflns_av_sigmaI/netI           0.0162
_diffrn_reflns_theta_min                2.47
_diffrn_reflns_theta_max                25.35
_diffrn_reflns_theta_full               25.35
_diffrn_measured_fraction_theta_max     0.998
_diffrn_measured_fraction_theta_full    0.998
_diffrn_reflns_limit_h_min              -19
_diffrn_reflns_limit_h_max              19
_diffrn_reflns_limit_k_min              -11
_diffrn_reflns_limit_k_max              11
_diffrn_reflns_limit_l_min              -10
_diffrn_reflns_limit_l_max              10

_refine_special_details                 
;
Refinement of F^2^ against ALL reflections.  The weighted R-factor wR and
goodness of fit S are based on F^2^, conventional R-factors R are based
on F, with F set to zero for negative F^2^. The threshold expression of
F^2^ > 2sigma(F^2^) is used only for calculating R-factors(gt) etc. and is
not relevant to the choice of reflections for refinement.  R-factors based
on F^2^ are statistically about twice as large as those based on F, and R-
factors based on ALL data will be even larger.
;

_reflns_number_total                    2515
_reflns_number_gt                       2221
_reflns_threshold_expression            >2sigma(I)

_refine_ls_structure_factor_coef        Fsqd
_refine_ls_matrix_type                  full
_refine_ls_R_factor_all                 0.0299
_refine_ls_R_factor_gt                  0.0244
_refine_ls_wR_factor_gt                 0.0674
_refine_ls_wR_factor_ref                0.0727
_refine_ls_goodness_of_fit_ref          1.000
_refine_ls_restrained_S_all             1.000
_refine_ls_number_reflns                2515
_refine_ls_number_parameters            165
_refine_ls_number_restraints            0
_refine_ls_hydrogen_treatment           refxyz
_refine_ls_weighting_scheme             calc
_refine_ls_weighting_details
    'calc w=1/[\s^2^(Fo^2^)+(0.0421P)^2^+0.4208P] where P=(Fo^2^+2Fc^2^)/3'

_atom_sites_solution_hydrogens          geom
_atom_sites_solution_primary            direct
_atom_sites_solution_secondary          difmap

_refine_ls_shift/su_max                 0.002
_refine_ls_shift/su_mean                0.000
_refine_diff_density_max                0.203
_refine_diff_density_min                -0.224
_refine_ls_extinction_method            none
_refine_ls_extinction_coef              ?

loop_
    _atom_type_symbol
    _atom_type_description
    _atom_type_scat_dispersion_real
    _atom_type_scat_dispersion_imag
    _atom_type_scat_source
    C C 0.0033 0.0016 'International Tables Vol C Tables 4.2.6.8 and 6.1.1.4'
    H H 0.0000 0.0000 'International Tables Vol C Tables 4.2.6.8 and 6.1.1.4'
    O O 0.0106 0.0060 'International Tables Vol C Tables 4.2.6.8 and 6.1.1.4'
    Fe Fe 0.3463 0.8444
     'International Tables Vol C Tables 4.2.6.8 and 6.1.1.4'

_computing_data_collection              
    'Bruker Instrument Service v2010.9.0.0'
_computing_cell_refinement              'SAINT V7.68A (Bruker AXS, 2009)'
_computing_data_reduction               'SAINT V7.68A (Bruker AXS, 2009)'
_computing_structure_solution           'SHELXS-97 (Sheldrick, 2008)'
_computing_structure_refinement         'SHELXL-97 (Sheldrick, 2008)'
_computing_molecular_graphics           ?
_computing_publication_material         ?

loop_
    _atom_site_type_symbol
    _atom_site_label
    _atom_site_fract_x
    _atom_site_fract_y
    _atom_site_fract_z
    _atom_site_U_iso_or_equiv
    _atom_site_adp_type
    _atom_site_calc_flag
    _atom_site_refinement_flags
    _atom_site_occupancy
    _atom_site_disorder_assembly
    _atom_site_disorder_group
    C C1 0.73671(11) 0.62054(18) 0.9427(2) 0.0429(4) Uani d . 1 . .
    C C2 0.71842(12) 0.52483(19) 1.0540(2) 0.0469(4) Uani d . 1 . .
    H H2 0.7567 0.4651 1.1089 0.056 Uiso calc R 1 . .
    C C3 0.63236(13) 0.5350(2) 1.0680(2) 0.0510(5) Uani d . 1 . .
    H H3 0.6041 0.4829 1.1325 0.061 Uiso calc R 1 . .
    C C4 0.59719(12) 0.6377(2) 0.9669(2) 0.0537(5) Uani d . 1 . .
    H H4 0.5415 0.6661 0.9532 0.064 Uiso calc R 1 . .
    C C5 0.66107(12) 0.69076(19) 0.8896(2) 0.0500(4) Uani d . 1 . .
    H H5 0.6545 0.76 0.8162 0.06 Uiso calc R 1 . .
    C C6 0.69476(14) 0.3761(2) 0.6876(2) 0.0598(5) Uani d . 1 . .
    H H6 0.7485 0.3853 0.6626 0.072 Uiso calc R 1 . .
    C C7 0.67059(16) 0.2834(2) 0.7935(3) 0.0647(6) Uani d . 1 . .
    H H7 0.7053 0.2202 0.851 0.078 Uiso calc R 1 . .
    C C8 0.58490(16) 0.3019(2) 0.7980(3) 0.0718(7) Uani d . 1 . .
    H H8 0.5528 0.2533 0.8591 0.086 Uiso calc R 1 . .
    C C9 0.55588(14) 0.4069(3) 0.6944(3) 0.0745(7) Uani d . 1 . .
    H H9 0.5013 0.4401 0.6746 0.089 Uiso calc R 1 . .
    C C10 0.62482(16) 0.4529(3) 0.6254(2) 0.0662(6) Uani d . 1 . .
    H H10 0.6237 0.5218 0.5521 0.079 Uiso calc R 1 . .
    C C11 0.82100(12) 0.6425(2) 0.8932(3) 0.0626(6) Uani d . 1 . .
    H H11A 0.8133 0.6671 0.7868 0.075 Uiso calc R 1 . .
    H H11B 0.8522 0.556 0.9046 0.075 Uiso calc R 1 . .
    C C12 0.87156(11) 0.7552(2) 0.9823(2) 0.0481(4) Uani d . 1 . .
    C C13 0.83900(14) 0.8993(2) 0.9532(3) 0.0681(6) Uani d . 1 . .
    H H13A 0.8793 0.9649 1.0007 0.102 Uiso calc R 1 . .
    H H13B 0.7874 0.9097 0.994 0.102 Uiso calc R 1 . .
    H H13C 0.8294 0.9161 0.8462 0.102 Uiso calc R 1 . .
    C C14 0.94008(11) 0.7220(2) 1.0758(2) 0.0545(5) Uani d . 1 . .
    H H14 0.9538 0.6281 1.0828 0.065 Uiso calc R 1 . .
    C C15 0.99685(12) 0.8174(2) 1.1696(2) 0.0558(5) Uani d . 1 . .
    C C16 1.07947(15) 0.7580(3) 1.2363(4) 0.0950(9) Uani d . 1 . .
    H H16A 1.1099 0.8256 1.3015 0.142 Uiso calc R 1 . .
    H H16B 1.1111 0.7339 1.1567 0.142 Uiso calc R 1 . .
    H H16C 1.0705 0.6762 1.2937 0.142 Uiso calc R 1 . .
    Fe Fe1 0.647239(14) 0.48311(2) 0.85240(3) 0.03906(11) Uani d . 1 . .
    O O1 0.98056(10) 0.93614(17) 1.1937(2) 0.0777(5) Uani d . 1 . .

loop_
    _atom_site_aniso_label
    _atom_site_aniso_U_11
    _atom_site_aniso_U_22
    _atom_site_aniso_U_33
    _atom_site_aniso_U_12
    _atom_site_aniso_U_13
    _atom_site_aniso_U_23
    C1 0.0384(9) 0.0435(9) 0.0459(10) -0.0075(7) 0.0025(7) -0.0102(7)
    C2 0.0502(11) 0.0477(10) 0.0389(9) 0.0016(8) -0.0074(8) -0.0043(7)
    C3 0.0562(12) 0.0537(11) 0.0447(10) -0.0109(9) 0.0126(9) -0.0082(8)
    C4 0.0404(10) 0.0486(10) 0.0713(13) 0.0022(8) 0.0051(9) -0.0132(9)
    C5 0.0558(11) 0.0364(9) 0.0553(11) -0.0018(8) -0.0005(9) 0.0015(8)
    C6 0.0602(13) 0.0671(13) 0.0525(11) -0.0065(10) 0.0100(9) -0.0188(10)
    C7 0.0849(16) 0.0444(11) 0.0644(13) -0.0012(10) 0.0085(12) -0.0141(9)
    C8 0.0820(17) 0.0640(14) 0.0723(15) -0.0351(13) 0.0213(12) -0.0248(12)
    C9 0.0491(12) 0.0941(18) 0.0740(15) -0.0113(12) -0.0134(11) -0.0322(14)
    C10 0.0786(16) 0.0764(14) 0.0394(11) -0.0074(12) -0.0058(10) -0.0075(10)
    C11 0.0485(11) 0.0755(14) 0.0663(13) -0.0191(10) 0.0172(9) -0.0291(11)
    C12 0.0427(10) 0.0542(10) 0.0506(11) -0.0128(8) 0.0173(8) -0.0094(8)
    C13 0.0658(14) 0.0633(13) 0.0709(14) -0.0144(11) -0.0054(11) 0.0124(11)
    C14 0.0414(10) 0.0428(10) 0.0800(14) -0.0062(8) 0.0116(9) -0.0099(9)
    C15 0.0435(10) 0.0532(12) 0.0704(13) -0.0121(9) 0.0070(9) 0.0002(10)
    C16 0.0583(15) 0.0757(17) 0.140(3) -0.0128(12) -0.0249(15) 0.0079(17)
    Fe1 0.03676(16) 0.03963(16) 0.03888(16) -0.00405(9) -0.00126(11)
     -0.00262(9)
    O1 0.0678(10) 0.0595(10) 0.1020(13) -0.0096(8) -0.0012(9) -0.0247(9)

_geom_special_details                   
;
All esds (except the esd in the dihedral angle between two l.s. planes)
are estimated using the full covariance matrix.  The cell esds are taken
into account individually in the estimation of esds in distances, angles
and torsion angles; correlations between esds in cell parameters are only
used when they are defined by crystal symmetry.  An approximate (isotropic)
treatment of cell esds is used for estimating esds involving l.s. planes.
;

loop_
    _geom_bond_atom_site_label_1
    _geom_bond_atom_site_label_2
    _geom_bond_site_symmetry_2
    _geom_bond_distance
    _geom_bond_publ_flag
    C1 C5 . 1.416(3) ?
    C1 C2 . 1.416(3) ?
    C1 C11 . 1.502(3) ?
    C1 Fe1 . 2.0374(16) ?
    C2 C3 . 1.414(3) ?
    C2 Fe1 . 2.0339(18) ?
    C2 H2 . 0.93 ?
    C3 C4 . 1.403(3) ?
    C3 Fe1 . 2.0350(18) ?
    C3 H3 . 0.93 ?
    C4 C5 . 1.414(3) ?
    C4 Fe1 . 2.0350(18) ?
    C4 H4 . 0.93 ?
    C5 Fe1 . 2.0313(18) ?
    C5 H5 . 0.93 ?
    C6 C10 . 1.396(3) ?
    C6 C7 . 1.395(3) ?
    C6 Fe1 . 2.032(2) ?
    C6 H6 . 0.93 ?
    C7 C8 . 1.400(3) ?
    C7 Fe1 . 2.041(2) ?
    C7 H7 . 0.93 ?
    C8 C9 . 1.404(4) ?
    C8 Fe1 . 2.036(2) ?
    C8 H8 . 0.93 ?
    C9 C10 . 1.416(3) ?
    C9 Fe1 . 2.028(2) ?
    C9 H9 . 0.93 ?
    C10 Fe1 . 2.029(2) ?
    C10 H10 . 0.93 ?
    C11 C12 . 1.513(2) ?
    C11 H11A . 0.97 ?
    C11 H11B . 0.97 ?
    C12 C14 . 1.326(3) ?
    C12 C13 . 1.492(3) ?
    C13 H13A . 0.96 ?
    C13 H13B . 0.96 ?
    C13 H13C . 0.96 ?
    C14 C15 . 1.471(3) ?
    C14 H14 . 0.93 ?
    C15 O1 . 1.198(3) ?
    C15 C16 . 1.495(3) ?
    C16 H16A . 0.96 ?
    C16 H16B . 0.96 ?
    C16 H16C . 0.96 ?

loop_
    _geom_angle_atom_site_label_1
    _geom_angle_atom_site_label_2
    _geom_angle_atom_site_label_3
    _geom_angle_site_symmetry_1
    _geom_angle_site_symmetry_3
    _geom_angle
    _geom_angle_publ_flag
    C5 C1 C2 . . 106.87(16) ?
    C5 C1 C11 . . 127.35(18) ?
    C2 C1 C11 . . 125.77(18) ?
    C5 C1 Fe1 . . 69.40(10) ?
    C2 C1 Fe1 . . 69.52(10) ?
    C11 C1 Fe1 . . 126.48(12) ?
    C3 C2 C1 . . 108.73(16) ?
    C3 C2 Fe1 . . 69.70(11) ?
    C1 C2 Fe1 . . 69.78(10) ?
    C3 C2 H2 . . 125.6 ?
    C1 C2 H2 . . 125.6 ?
    Fe1 C2 H2 . . 126.5 ?
    C4 C3 C2 . . 107.75(17) ?
    C4 C3 Fe1 . . 69.84(11) ?
    C2 C3 Fe1 . . 69.62(10) ?
    C4 C3 H3 . . 126.1 ?
    C2 C3 H3 . . 126.1 ?
    Fe1 C3 H3 . . 126.0 ?
    C3 C4 C5 . . 108.17(17) ?
    C3 C4 Fe1 . . 69.84(11) ?
    C5 C4 Fe1 . . 69.51(10) ?
    C3 C4 H4 . . 125.9 ?
    C5 C4 H4 . . 125.9 ?
    Fe1 C4 H4 . . 126.3 ?
    C4 C5 C1 . . 108.47(17) ?
    C4 C5 Fe1 . . 69.79(10) ?
    C1 C5 Fe1 . . 69.86(10) ?
    C4 C5 H5 . . 125.8 ?
    C1 C5 H5 . . 125.8 ?
    Fe1 C5 H5 . . 126.2 ?
    C10 C6 C7 . . 108.7(2) ?
    C10 C6 Fe1 . . 69.76(12) ?
    C7 C6 Fe1 . . 70.31(12) ?
    C10 C6 H6 . . 125.6 ?
    C7 C6 H6 . . 125.6 ?
    Fe1 C6 H6 . . 125.9 ?
    C8 C7 C6 . . 108.0(2) ?
    C8 C7 Fe1 . . 69.73(12) ?
    C6 C7 Fe1 . . 69.63(12) ?
    C8 C7 H7 . . 126.0 ?
    C6 C7 H7 . . 126.0 ?
    Fe1 C7 H7 . . 126.2 ?
    C7 C8 C9 . . 108.1(2) ?
    C7 C8 Fe1 . . 70.10(12) ?
    C9 C8 Fe1 . . 69.49(12) ?
    C7 C8 H8 . . 125.9 ?
    C9 C8 H8 . . 125.9 ?
    Fe1 C8 H8 . . 126.1 ?
    C8 C9 C10 . . 107.6(2) ?
    C8 C9 Fe1 . . 70.07(12) ?
    C10 C9 Fe1 . . 69.60(12) ?
    C8 C9 H9 . . 126.2 ?
    C10 C9 H9 . . 126.2 ?
    Fe1 C9 H9 . . 125.7 ?
    C6 C10 C9 . . 107.6(2) ?
    C6 C10 Fe1 . . 70.01(12) ?
    C9 C10 Fe1 . . 69.56(12) ?
    C6 C10 H10 . . 126.2 ?
    C9 C10 H10 . . 126.2 ?
    Fe1 C10 H10 . . 125.8 ?
    C1 C11 C12 . . 112.89(15) ?
    C1 C11 H11A . . 109.0 ?
    C12 C11 H11A . . 109.0 ?
    C1 C11 H11B . . 109.0 ?
    C12 C11 H11B . . 109.0 ?
    H11A C11 H11B . . 107.8 ?
    C14 C12 C13 . . 125.04(18) ?
    C14 C12 C11 . . 119.90(19) ?
    C13 C12 C11 . . 115.04(18) ?
    C12 C13 H13A . . 109.5 ?
    C12 C13 H13B . . 109.5 ?
    H13A C13 H13B . . 109.5 ?
    C12 C13 H13C . . 109.5 ?
    H13A C13 H13C . . 109.5 ?
    H13B C13 H13C . . 109.5 ?
    C12 C14 C15 . . 127.23(19) ?
    C12 C14 H14 . . 116.4 ?
    C15 C14 H14 . . 116.4 ?
    O1 C15 C14 . . 124.2(2) ?
    O1 C15 C16 . . 119.9(2) ?
    C14 C15 C16 . . 115.91(19) ?
    C15 C16 H16A . . 109.5 ?
    C15 C16 H16B . . 109.5 ?
    H16A C16 H16B . . 109.5 ?
    C15 C16 H16C . . 109.5 ?
    H16A C16 H16C . . 109.5 ?
    H16B C16 H16C . . 109.5 ?
    C10 Fe1 C9 . . 40.84(10) ?
    C10 Fe1 C5 . . 107.69(9) ?
    C9 Fe1 C5 . . 121.41(10) ?
    C10 Fe1 C6 . . 40.23(9) ?
    C9 Fe1 C6 . . 67.94(9) ?
    C5 Fe1 C6 . . 124.90(9) ?
    C10 Fe1 C8 . . 68.09(10) ?
    C9 Fe1 C8 . . 40.44(10) ?
    C5 Fe1 C8 . . 156.84(10) ?
    C6 Fe1 C8 . . 67.54(9) ?
    C10 Fe1 C4 . . 125.39(10) ?
    C9 Fe1 C4 . . 108.24(9) ?
    C5 Fe1 C4 . . 40.70(8) ?
    C6 Fe1 C4 . . 161.94(9) ?
    C8 Fe1 C4 . . 121.84(9) ?
    C10 Fe1 C3 . . 162.13(10) ?
    C9 Fe1 C3 . . 125.15(9) ?
    C5 Fe1 C3 . . 68.25(8) ?
    C6 Fe1 C3 . . 156.31(9) ?
    C8 Fe1 C3 . . 108.37(9) ?
    C4 Fe1 C3 . . 40.32(8) ?
    C10 Fe1 C2 . . 155.68(10) ?
    C9 Fe1 C2 . . 162.02(10) ?
    C5 Fe1 C2 . . 68.06(8) ?
    C6 Fe1 C2 . . 121.15(8) ?
    C8 Fe1 C2 . . 125.31(9) ?
    C4 Fe1 C2 . . 68.00(8) ?
    C3 Fe1 C2 . . 40.68(8) ?
    C10 Fe1 C7 . . 67.74(10) ?
    C9 Fe1 C7 . . 67.85(10) ?
    C5 Fe1 C7 . . 161.34(9) ?
    C6 Fe1 C7 . . 40.05(9) ?
    C8 Fe1 C7 . . 40.17(9) ?
    C4 Fe1 C7 . . 156.64(9) ?
    C3 Fe1 C7 . . 121.67(9) ?
    C2 Fe1 C7 . . 108.18(9) ?
    C10 Fe1 C1 . . 120.31(9) ?
    C9 Fe1 C1 . . 156.11(10) ?
    C5 Fe1 C1 . . 40.75(7) ?
    C6 Fe1 C1 . . 107.25(8) ?
    C8 Fe1 C1 . . 161.43(10) ?
    C4 Fe1 C1 . . 68.66(7) ?
    C3 Fe1 C1 . . 68.78(7) ?
    C2 Fe1 C1 . . 40.70(7) ?
    C7 Fe1 C1 . . 124.50(9) ?
#===END

data_5b

_audit_creation_method                  'APEX2 v2010.9-1'
_chemical_name_systematic 
;
?
;
_chemical_name_common                   ?
_chemical_formula_moiety                ?
_chemical_formula_sum         
'C18 H22 O2 Ru'
_chemical_formula_weight                371.43
_chemical_compound_source               'syntesis'

_chemical_melting_point                 ?

_space_group_crystal_system             triclinic
_space_group_name_H-M_alt               'P -1'
_space_group_name_Hall                  '-P 1'
loop_
    _space_group_symop_operation_xyz
    'x, y, z'
    '-x, -y, -z'

_cell_length_a                          6.02370(10)
_cell_length_b                          11.2033(2)
_cell_length_c                          13.4735(3)
_cell_angle_alpha                       112.7480(10)
_cell_angle_beta                        96.2760(10)
_cell_angle_gamma                       95.6760(10)
_cell_volume                            823.57(3)
_cell_formula_units_Z                   2
_cell_measurement_reflns_used           9983
_cell_measurement_theta_min             3.0667
_cell_measurement_theta_max             27.8712
_cell_measurement_temperature           296.(2)

_exptl_crystal_description              needle
_exptl_crystal_colour                   'clear colourless'
_exptl_crystal_size_max                 0.380
_exptl_crystal_size_mid                 0.090
_exptl_crystal_size_min                 0.040
_exptl_crystal_density_diffrn           1.498
_exptl_crystal_density_meas             ?
_exptl_crystal_density_method           'not measured'
_exptl_crystal_F_000                    380

_exptl_absorpt_coefficient_mu           0.953
_exptl_absorpt_correction_type          multi-scan
_exptl_absorpt_process_details          sadabs
_exptl_absorpt_correction_T_min         0.84
_exptl_absorpt_correction_T_max         0.96

_exptl_special_details                  
;
;

_diffrn_ambient_temperature             296.(2)

_diffrn_source                          ?
_diffrn_source_type                     ?

_diffrn_radiation_type                  ?
_diffrn_radiation_wavelength            0.71073
_diffrn_radiation_monochromator         ?

_diffrn_measurement_device_type         ?
_diffrn_measurement_method              ?

_diffrn_detector_area_resol_mean        8.3333

_diffrn_reflns_number                   19554
_diffrn_reflns_av_R_equivalents         0.0215
_diffrn_reflns_av_sigmaI/netI           0.0137
_diffrn_reflns_theta_min                1.66
_diffrn_reflns_theta_max                25.35
_diffrn_reflns_theta_full               25.35
_diffrn_measured_fraction_theta_max     0.997
_diffrn_measured_fraction_theta_full    0.997
_diffrn_reflns_limit_h_min              -7
_diffrn_reflns_limit_h_max              7
_diffrn_reflns_limit_k_min              -13
_diffrn_reflns_limit_k_max              13
_diffrn_reflns_limit_l_min              -16
_diffrn_reflns_limit_l_max              16

_refine_special_details                 
;
Refinement of F^2^ against ALL reflections.  The weighted R-factor wR and
goodness of fit S are based on F^2^, conventional R-factors R are based
on F, with F set to zero for negative F^2^. The threshold expression of
F^2^ > 2sigma(F^2^) is used only for calculating R-factors(gt) etc. and is
not relevant to the choice of reflections for refinement.  R-factors based
on F^2^ are statistically about twice as large as those based on F, and R-
factors based on ALL data will be even larger.
;

_reflns_number_total                    3001
_reflns_number_gt                       2819
_reflns_threshold_expression            >2sigma(I)

_refine_ls_structure_factor_coef        Fsqd
_refine_ls_matrix_type                  full
_refine_ls_R_factor_all                 0.0235
_refine_ls_R_factor_gt                  0.0197
_refine_ls_wR_factor_gt                 0.0612
_refine_ls_wR_factor_ref                0.0818
_refine_ls_goodness_of_fit_ref          1.000
_refine_ls_restrained_S_all             1.000
_refine_ls_number_reflns                3001
_refine_ls_number_parameters            193
_refine_ls_number_restraints            0
_refine_ls_hydrogen_treatment           refxyz
_refine_ls_weighting_scheme             calc
_refine_ls_weighting_details
    'calc w=1/[\s^2^(Fo^2^)+(0.0677P)^2^+0.1868P] where P=(Fo^2^+2Fc^2^)/3'

_atom_sites_solution_hydrogens          geom
_atom_sites_solution_primary            direct
_atom_sites_solution_secondary          difmap

_refine_ls_shift/su_max                 0.001
_refine_ls_shift/su_mean                0.000
_refine_diff_density_max                0.487
_refine_diff_density_min                -0.397
_refine_ls_extinction_method            none
_refine_ls_extinction_coef              ?

loop_
    _atom_type_symbol
    _atom_type_description
    _atom_type_scat_dispersion_real
    _atom_type_scat_dispersion_imag
    _atom_type_scat_source
    C C 0.0033 0.0016 'International Tables Vol C Tables 4.2.6.8 and 6.1.1.4'
    H H 0.0000 0.0000 'International Tables Vol C Tables 4.2.6.8 and 6.1.1.4'
    O O 0.0106 0.0060 'International Tables Vol C Tables 4.2.6.8 and 6.1.1.4'
    Ru Ru -1.2594 0.8363
     'International Tables Vol C Tables 4.2.6.8 and 6.1.1.4'

_computing_data_collection              
    'Bruker Instrument Service v2010.9.0.0'
_computing_cell_refinement              'SAINT V7.68A (Bruker AXS, 2009)'
_computing_data_reduction               'SAINT V7.68A (Bruker AXS, 2009)'
_computing_structure_solution           'SHELXS-97 (Sheldrick, 2008)'
_computing_structure_refinement         'SHELXL-97 (Sheldrick, 2008)'
_computing_molecular_graphics           ?
_computing_publication_material         ?

loop_
    _atom_site_type_symbol
    _atom_site_label
    _atom_site_fract_x
    _atom_site_fract_y
    _atom_site_fract_z
    _atom_site_U_iso_or_equiv
    _atom_site_adp_type
    _atom_site_calc_flag
    _atom_site_refinement_flags
    _atom_site_occupancy
    _atom_site_disorder_assembly
    _atom_site_disorder_group
    Ru Ru1 0.51302(3) 0.740839(16) 0.847374(14) 0.03591(11) Uani d . 1 . .
    C C1 0.6359(5) 0.7667(2) 0.7109(2) 0.0398(6) Uani d . 1 . .
    C C2 0.8093(5) 0.8265(3) 0.8040(2) 0.0468(6) Uani d . 1 . .
    H H2 0.9524 0.8033 0.8106 0.056 Uiso calc R 1 . .
    C C3 0.7234(6) 0.9281(3) 0.8849(3) 0.0536(7) Uani d . 1 . .
    H H3 0.8004 0.982 0.9542 0.064 Uiso calc R 1 . .
    C C4 0.5027(6) 0.9329(3) 0.8423(3) 0.0510(7) Uani d . 1 . .
    H H4 0.4088 0.9908 0.8782 0.061 Uiso calc R 1 . .
    C C5 0.4478(5) 0.8340(3) 0.7349(2) 0.0442(6) Uani d . 1 . .
    H H5 0.3119 0.8163 0.6882 0.053 Uiso calc R 1 . .
    C C6 0.4339(7) 0.5335(3) 0.8118(3) 0.0639(9) Uani d . 1 . .
    H H6 0.4608 0.4677 0.7485 0.077 Uiso calc R 1 . .
    C C7 0.5870(7) 0.5952(4) 0.9111(4) 0.0688(10) Uani d . 1 . .
    H H7 0.7321 0.5775 0.9248 0.083 Uiso calc R 1 . .
    C C8 0.4777(7) 0.6893(4) 0.9860(3) 0.0679(10) Uani d . 1 . .
    H H8 0.5387 0.744 1.0578 0.081 Uiso calc R 1 . .
    C C9 0.2617(6) 0.6850(4) 0.9326(3) 0.0624(9) Uani d . 1 . .
    H H9 0.1548 0.7368 0.9628 0.075 Uiso calc R 1 . .
    C C10 0.2346(6) 0.5889(3) 0.8256(3) 0.0635(9) Uani d . 1 . .
    H H10 0.1065 0.566 0.773 0.076 Uiso calc R 1 . .
    C C11 0.6504(6) 0.6555(3) 0.6055(2) 0.0505(7) Uani d . 1 . .
    H H11A 0.4991 0.6105 0.5699 0.061 Uiso calc R 1 . .
    H H11B 0.734 0.5934 0.6211 0.061 Uiso calc R 1 . .
    C C12 0.7641(5) 0.7000(3) 0.5286(2) 0.0461(6) Uani d . 1 . .
    H H12 0.694 0.7548 0.5025 0.055 Uiso calc R 1 . .
    C C13 0.9546(5) 0.6667(3) 0.4962(2) 0.0483(6) Uani d . 1 . .
    H H13 1.0231 0.613 0.5241 0.058 Uiso calc R 1 . .
    C C14 1.0716(5) 0.7051(3) 0.4205(2) 0.0463(6) Uani d . 1 . .
    C C15 1.0652(5) 0.8396(3) 0.3142(2) 0.0452(6) Uani d . 1 . .
    C C16 1.2882(7) 0.9238(5) 0.3730(4) 0.0852(13) Uani d . 1 . .
    H H16A 1.2696 0.9847 0.4437 0.128 Uiso calc R 1 . .
    H H16B 1.3412 0.971 0.3318 0.128 Uiso calc R 1 . .
    H H16C 1.3963 0.8694 0.3811 0.128 Uiso calc R 1 . .
    C C17 1.0791(10) 0.7324(4) 0.2074(3) 0.0917(14) Uani d . 1 . .
    H H17A 1.1127 0.7695 0.1564 0.138 Uiso calc R 1 . .
    H H17B 0.9371 0.6748 0.1799 0.138 Uiso calc R 1 . .
    H H17C 1.1963 0.684 0.2172 0.138 Uiso calc R 1 . .
    C C18 0.8972(7) 0.9275(4) 0.3024(4) 0.0829(12) Uani d . 1 . .
    H H18A 0.8944 0.9954 0.3724 0.124 Uiso calc R 1 . .
    H H18B 0.7495 0.8765 0.2734 0.124 Uiso calc R 1 . .
    H H18C 0.9415 0.9661 0.2537 0.124 Uiso calc R 1 . .
    O O1 0.9668(3) 0.78435(19) 0.38570(16) 0.0449(4) Uani d . 1 . .
    O O2 1.2426(5) 0.6653(3) 0.3929(2) 0.0799(8) Uani d . 1 . .

loop_
    _atom_site_aniso_label
    _atom_site_aniso_U_11
    _atom_site_aniso_U_22
    _atom_site_aniso_U_33
    _atom_site_aniso_U_12
    _atom_site_aniso_U_13
    _atom_site_aniso_U_23
    Ru1 0.04102(15) 0.03589(15) 0.03240(15) 0.00667(9) 0.01030(9) 0.01408(10)
    C1 0.0508(15) 0.0359(12) 0.0366(13) 0.0071(11) 0.0153(11) 0.0165(11)
    C2 0.0417(14) 0.0520(16) 0.0491(16) 0.0026(12) 0.0114(12) 0.0231(13)
    C3 0.0660(19) 0.0428(15) 0.0408(15) -0.0084(13) 0.0083(14) 0.0089(12)
    C4 0.0708(19) 0.0363(13) 0.0512(17) 0.0163(13) 0.0246(15) 0.0175(12)
    C5 0.0521(15) 0.0439(14) 0.0444(15) 0.0105(12) 0.0109(12) 0.0245(12)
    C6 0.088(2) 0.0404(15) 0.070(2) 0.0072(16) 0.0281(19) 0.0262(15)
    C7 0.069(2) 0.073(2) 0.091(3) 0.0203(19) 0.020(2) 0.059(2)
    C8 0.091(3) 0.077(2) 0.0497(19) 0.0077(19) 0.0160(18) 0.0399(18)
    C9 0.066(2) 0.072(2) 0.065(2) 0.0122(17) 0.0305(17) 0.0387(18)
    C10 0.0619(19) 0.0583(19) 0.073(2) -0.0097(15) 0.0088(16) 0.0343(17)
    C11 0.0723(19) 0.0376(13) 0.0410(15) 0.0074(13) 0.0218(14) 0.0120(11)
    C12 0.0606(16) 0.0375(13) 0.0385(14) 0.0076(12) 0.0129(12) 0.0123(11)
    C13 0.0612(17) 0.0444(14) 0.0471(15) 0.0160(13) 0.0145(13) 0.0233(12)
    C14 0.0548(16) 0.0447(14) 0.0430(15) 0.0093(12) 0.0149(12) 0.0193(12)
    C15 0.0479(14) 0.0523(15) 0.0464(15) 0.0098(12) 0.0169(12) 0.0286(13)
    C16 0.068(2) 0.088(3) 0.109(3) -0.016(2) 0.005(2) 0.059(3)
    C17 0.148(4) 0.085(3) 0.053(2) 0.022(3) 0.045(2) 0.031(2)
    C18 0.086(3) 0.102(3) 0.103(3) 0.042(2) 0.036(2) 0.075(3)
    O1 0.0464(10) 0.0512(10) 0.0504(11) 0.0171(8) 0.0226(8) 0.0284(9)
    O2 0.0728(16) 0.0997(19) 0.111(2) 0.0493(15) 0.0484(15) 0.0722(18)

_geom_special_details                   
;
All esds (except the esd in the dihedral angle between two l.s. planes)
are estimated using the full covariance matrix.  The cell esds are taken
into account individually in the estimation of esds in distances, angles
and torsion angles; correlations between esds in cell parameters are only
used when they are defined by crystal symmetry.  An approximate (isotropic)
treatment of cell esds is used for estimating esds involving l.s. planes.
;

loop_
    _geom_bond_atom_site_label_1
    _geom_bond_atom_site_label_2
    _geom_bond_site_symmetry_2
    _geom_bond_distance
    _geom_bond_publ_flag
    Ru1 C1 . 2.164(3) ?
    Ru1 C5 . 2.172(3) ?
    Ru1 C6 . 2.173(3) ?
    Ru1 C10 . 2.177(3) ?
    Ru1 C7 . 2.177(3) ?
    Ru1 C9 . 2.180(3) ?
    Ru1 C2 . 2.184(3) ?
    Ru1 C8 . 2.183(3) ?
    Ru1 C4 . 2.186(3) ?
    Ru1 C3 . 2.185(3) ?
    C1 C5 . 1.420(4) ?
    C1 C2 . 1.428(4) ?
    C1 C11 . 1.503(4) ?
    C2 C3 . 1.426(4) ?
    C2 H2 . 0.93 ?
    C3 C4 . 1.404(5) ?
    C3 H3 . 0.93 ?
    C4 C5 . 1.419(4) ?
    C4 H4 . 0.93 ?
    C5 H5 . 0.93 ?
    C6 C10 . 1.403(5) ?
    C6 C7 . 1.417(6) ?
    C6 H6 . 0.93 ?
    C7 C8 . 1.422(6) ?
    C7 H7 . 0.93 ?
    C8 C9 . 1.404(5) ?
    C8 H8 . 0.93 ?
    C9 C10 . 1.407(5) ?
    C9 H9 . 0.93 ?
    C10 H10 . 0.93 ?
    C11 C12 . 1.509(4) ?
    C11 H11A . 0.97 ?
    C11 H11B . 0.97 ?
    C12 C13 . 1.309(4) ?
    C12 H12 . 0.93 ?
    C13 C14 . 1.468(4) ?
    C13 H13 . 0.93 ?
    C14 O2 . 1.202(4) ?
    C14 O1 . 1.333(3) ?
    C15 O1 . 1.475(3) ?
    C15 C17 . 1.493(5) ?
    C15 C16 . 1.504(5) ?
    C15 C18 . 1.517(4) ?
    C16 H16A . 0.96 ?
    C16 H16B . 0.96 ?
    C16 H16C . 0.96 ?
    C17 H17A . 0.96 ?
    C17 H17B . 0.96 ?
    C17 H17C . 0.96 ?
    C18 H18A . 0.96 ?
    C18 H18B . 0.96 ?
    C18 H18C . 0.96 ?

loop_
    _geom_angle_atom_site_label_1
    _geom_angle_atom_site_label_2
    _geom_angle_atom_site_label_3
    _geom_angle_site_symmetry_1
    _geom_angle_site_symmetry_3
    _geom_angle
    _geom_angle_publ_flag
    C1 Ru1 C5 . . 38.24(11) ?
    C1 Ru1 C6 . . 110.12(12) ?
    C5 Ru1 C6 . . 126.70(13) ?
    C1 Ru1 C10 . . 122.25(13) ?
    C5 Ru1 C10 . . 111.55(13) ?
    C6 Ru1 C10 . . 37.62(14) ?
    C1 Ru1 C7 . . 127.27(14) ?
    C5 Ru1 C7 . . 161.39(16) ?
    C6 Ru1 C7 . . 38.01(16) ?
    C10 Ru1 C7 . . 63.25(15) ?
    C1 Ru1 C9 . . 155.62(14) ?
    C5 Ru1 C9 . . 124.77(13) ?
    C6 Ru1 C9 . . 63.09(14) ?
    C10 Ru1 C9 . . 37.68(15) ?
    C7 Ru1 C9 . . 63.28(15) ?
    C1 Ru1 C2 . . 38.33(11) ?
    C5 Ru1 C2 . . 63.60(11) ?
    C6 Ru1 C2 . . 123.63(13) ?
    C10 Ru1 C2 . . 155.35(14) ?
    C7 Ru1 C2 . . 112.93(13) ?
    C9 Ru1 C2 . . 165.44(14) ?
    C1 Ru1 C8 . . 163.38(14) ?
    C5 Ru1 C8 . . 158.12(15) ?
    C6 Ru1 C8 . . 63.32(15) ?
    C10 Ru1 C8 . . 62.97(15) ?
    C7 Ru1 C8 . . 38.06(16) ?
    C9 Ru1 C8 . . 37.54(15) ?
    C2 Ru1 C8 . . 130.64(14) ?
    C1 Ru1 C4 . . 63.91(11) ?
    C5 Ru1 C4 . . 38.00(11) ?
    C6 Ru1 C4 . . 162.02(15) ?
    C10 Ru1 C4 . . 129.20(14) ?
    C7 Ru1 C4 . . 159.23(17) ?
    C9 Ru1 C4 . . 114.66(13) ?
    C2 Ru1 C4 . . 63.36(12) ?
    C8 Ru1 C4 . . 127.05(14) ?
    C1 Ru1 C3 . . 63.98(11) ?
    C5 Ru1 C3 . . 63.29(12) ?
    C6 Ru1 C3 . . 157.69(16) ?
    C10 Ru1 C3 . . 164.28(15) ?
    C7 Ru1 C3 . . 126.52(15) ?
    C9 Ru1 C3 . . 131.26(13) ?
    C2 Ru1 C3 . . 38.10(12) ?
    C8 Ru1 C3 . . 115.69(14) ?
    C4 Ru1 C3 . . 37.47(13) ?
    C5 C1 C2 . . 107.4(2) ?
    C5 C1 C11 . . 126.0(3) ?
    C2 C1 C11 . . 126.6(3) ?
    C5 C1 Ru1 . . 71.18(15) ?
    C2 C1 Ru1 . . 71.60(15) ?
    C11 C1 Ru1 . . 123.80(18) ?
    C3 C2 C1 . . 107.7(3) ?
    C3 C2 Ru1 . . 71.00(17) ?
    C1 C2 Ru1 . . 70.07(15) ?
    C3 C2 H2 . . 126.2 ?
    C1 C2 H2 . . 126.2 ?
    Ru1 C2 H2 . . 124.4 ?
    C4 C3 C2 . . 108.3(3) ?
    C4 C3 Ru1 . . 71.28(17) ?
    C2 C3 Ru1 . . 70.90(16) ?
    C4 C3 H3 . . 125.8 ?
    C2 C3 H3 . . 125.8 ?
    Ru1 C3 H3 . . 123.6 ?
    C3 C4 C5 . . 108.2(3) ?
    C3 C4 Ru1 . . 71.25(17) ?
    C5 C4 Ru1 . . 70.47(16) ?
    C3 C4 H4 . . 125.9 ?
    C5 C4 H4 . . 125.9 ?
    Ru1 C4 H4 . . 124.0 ?
    C4 C5 C1 . . 108.4(3) ?
    C4 C5 Ru1 . . 71.53(16) ?
    C1 C5 Ru1 . . 70.58(15) ?
    C4 C5 H5 . . 125.8 ?
    C1 C5 H5 . . 125.8 ?
    Ru1 C5 H5 . . 123.7 ?
    C10 C6 C7 . . 108.1(3) ?
    C10 C6 Ru1 . . 71.33(18) ?
    C7 C6 Ru1 . . 71.2(2) ?
    C10 C6 H6 . . 125.9 ?
    C7 C6 H6 . . 125.9 ?
    Ru1 C6 H6 . . 123.2 ?
    C6 C7 C8 . . 107.3(3) ?
    C6 C7 Ru1 . . 70.84(19) ?
    C8 C7 Ru1 . . 71.20(19) ?
    C6 C7 H7 . . 126.3 ?
    C8 C7 H7 . . 126.3 ?
    Ru1 C7 H7 . . 123.3 ?
    C9 C8 C7 . . 108.0(3) ?
    C9 C8 Ru1 . . 71.10(18) ?
    C7 C8 Ru1 . . 70.74(19) ?
    C9 C8 H8 . . 126.0 ?
    C7 C8 H8 . . 126.0 ?
    Ru1 C8 H8 . . 123.8 ?
    C8 C9 C10 . . 108.2(3) ?
    C8 C9 Ru1 . . 71.36(19) ?
    C10 C9 Ru1 . . 71.04(19) ?
    C8 C9 H9 . . 125.9 ?
    C10 C9 H9 . . 125.9 ?
    Ru1 C9 H9 . . 123.3 ?
    C6 C10 C9 . . 108.3(3) ?
    C6 C10 Ru1 . . 71.05(19) ?
    C9 C10 Ru1 . . 71.28(19) ?
    C6 C10 H10 . . 125.8 ?
    C9 C10 H10 . . 125.8 ?
    Ru1 C10 H10 . . 123.5 ?
    C1 C11 C12 . . 112.8(2) ?
    C1 C11 H11A . . 109.0 ?
    C12 C11 H11A . . 109.0 ?
    C1 C11 H11B . . 109.0 ?
    C12 C11 H11B . . 109.0 ?
    H11A C11 H11B . . 107.8 ?
    C13 C12 C11 . . 124.5(3) ?
    C13 C12 H12 . . 117.8 ?
    C11 C12 H12 . . 117.8 ?
    C12 C13 C14 . . 127.1(3) ?
    C12 C13 H13 . . 116.5 ?
    C14 C13 H13 . . 116.5 ?
    O2 C14 O1 . . 124.9(3) ?
    O2 C14 C13 . . 121.9(3) ?
    O1 C14 C13 . . 113.3(2) ?
    O1 C15 C17 . . 110.1(3) ?
    O1 C15 C16 . . 109.2(3) ?
    C17 C15 C16 . . 114.0(4) ?
    O1 C15 C18 . . 102.3(2) ?
    C17 C15 C18 . . 112.0(3) ?
    C16 C15 C18 . . 108.6(3) ?
    C15 C16 H16A . . 109.5 ?
    C15 C16 H16B . . 109.5 ?
    H16A C16 H16B . . 109.5 ?
    C15 C16 H16C . . 109.5 ?
    H16A C16 H16C . . 109.5 ?
    H16B C16 H16C . . 109.5 ?
    C15 C17 H17A . . 109.5 ?
    C15 C17 H17B . . 109.5 ?
    H17A C17 H17B . . 109.5 ?
    C15 C17 H17C . . 109.5 ?
    H17A C17 H17C . . 109.5 ?
    H17B C17 H17C . . 109.5 ?
    C15 C18 H18A . . 109.5 ?
    C15 C18 H18B . . 109.5 ?
    H18A C18 H18B . . 109.5 ?
    C15 C18 H18C . . 109.5 ?
    H18A C18 H18C . . 109.5 ?
    H18B C18 H18C . . 109.5 ?
    C14 O1 C15 . . 121.3(2) ?
#===END
